# Supplementary material
Source: MDPI journal article supplement (https://www.mdpi.com/2075-4442/11/11/469)
Supplement: s1 [file s1]

# Investigating the wettability, rheological, and tribological properties of ammonium-based protic ionic liquids as neat lubricants for steel-steel and steel-aluminium contacts

B Depu Kumar Patro <sup>1</sup>, P S Suvin <sup>1</sup>, Raimondas Kreivaitis <sup>2</sup> and Milda Gumbytė <sup>2\*</sup>

<sup>1</sup> Department of Mechanical Engineering, National Institute of Technology Karnataka, 575025, India

<sup>2</sup> Agriculture Academy, Vytautas Magnus University, K. Donelaičio Str. 58, 44248 Kaunas, Lithuania

\* Correspondence milda.gumbyte@vdu.lt

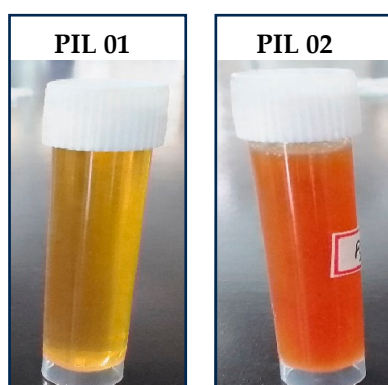

Figure S1. The appearance of the investigated lubricating fluids.

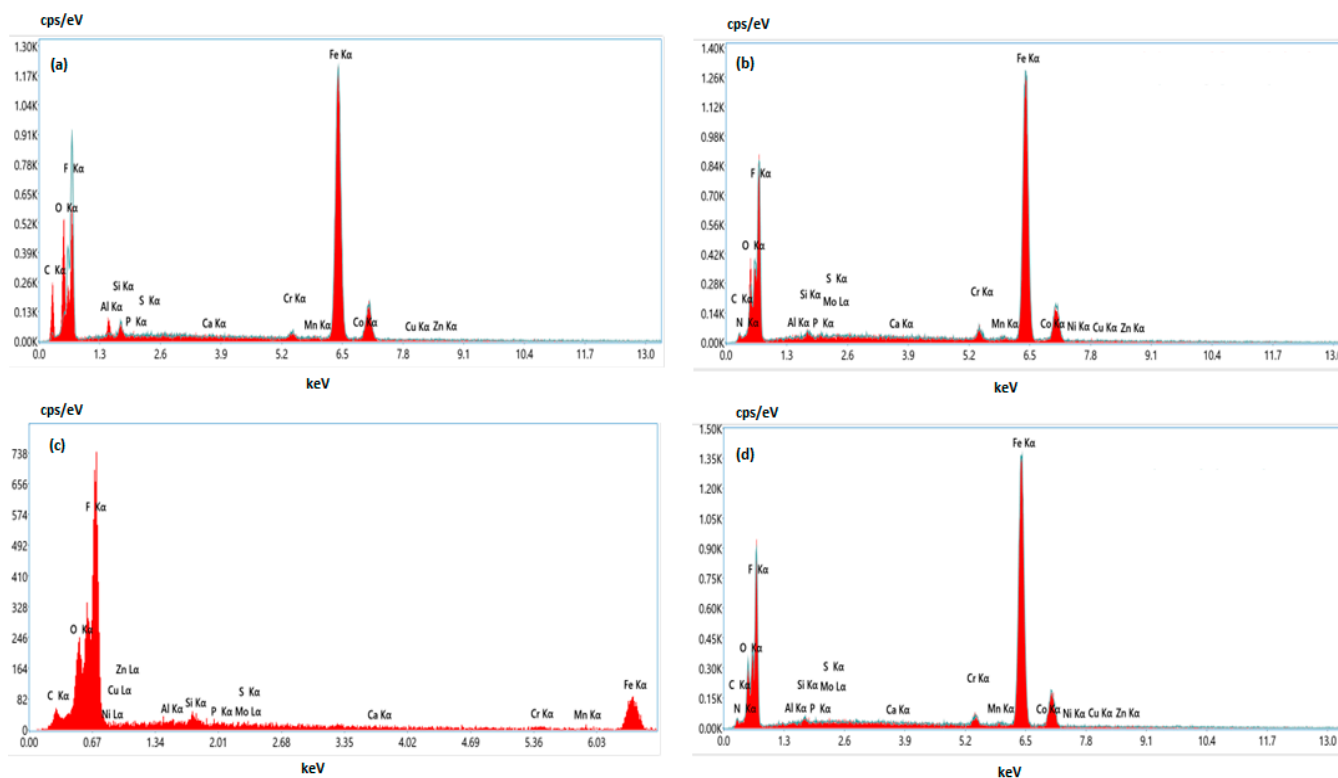

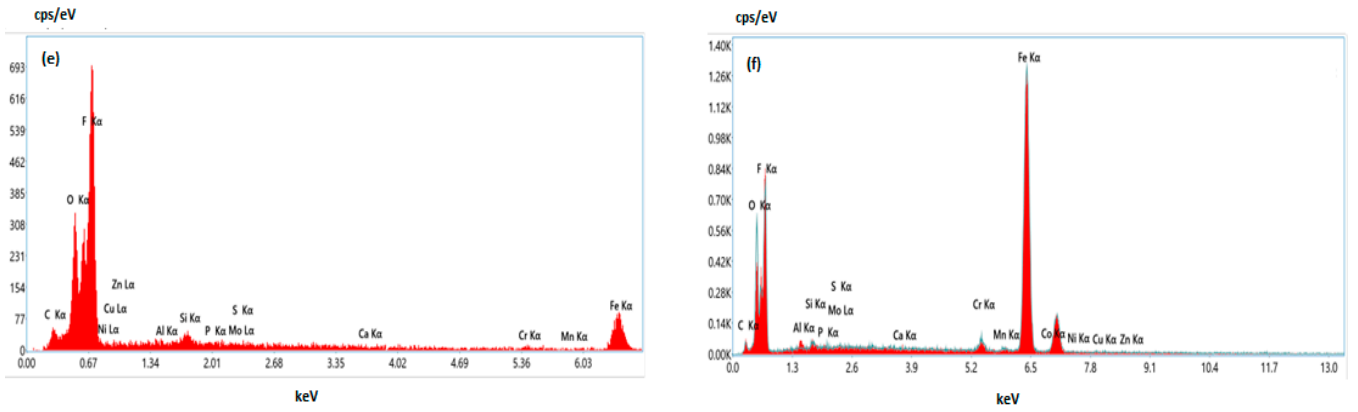

**Figure S2.** EDS analysis of wear scar surface at 30 °C and 80 °C on BS plate lubricated with (a and b) PIL01, (c and d) PIL02, (e and f) 20W40, respectively.

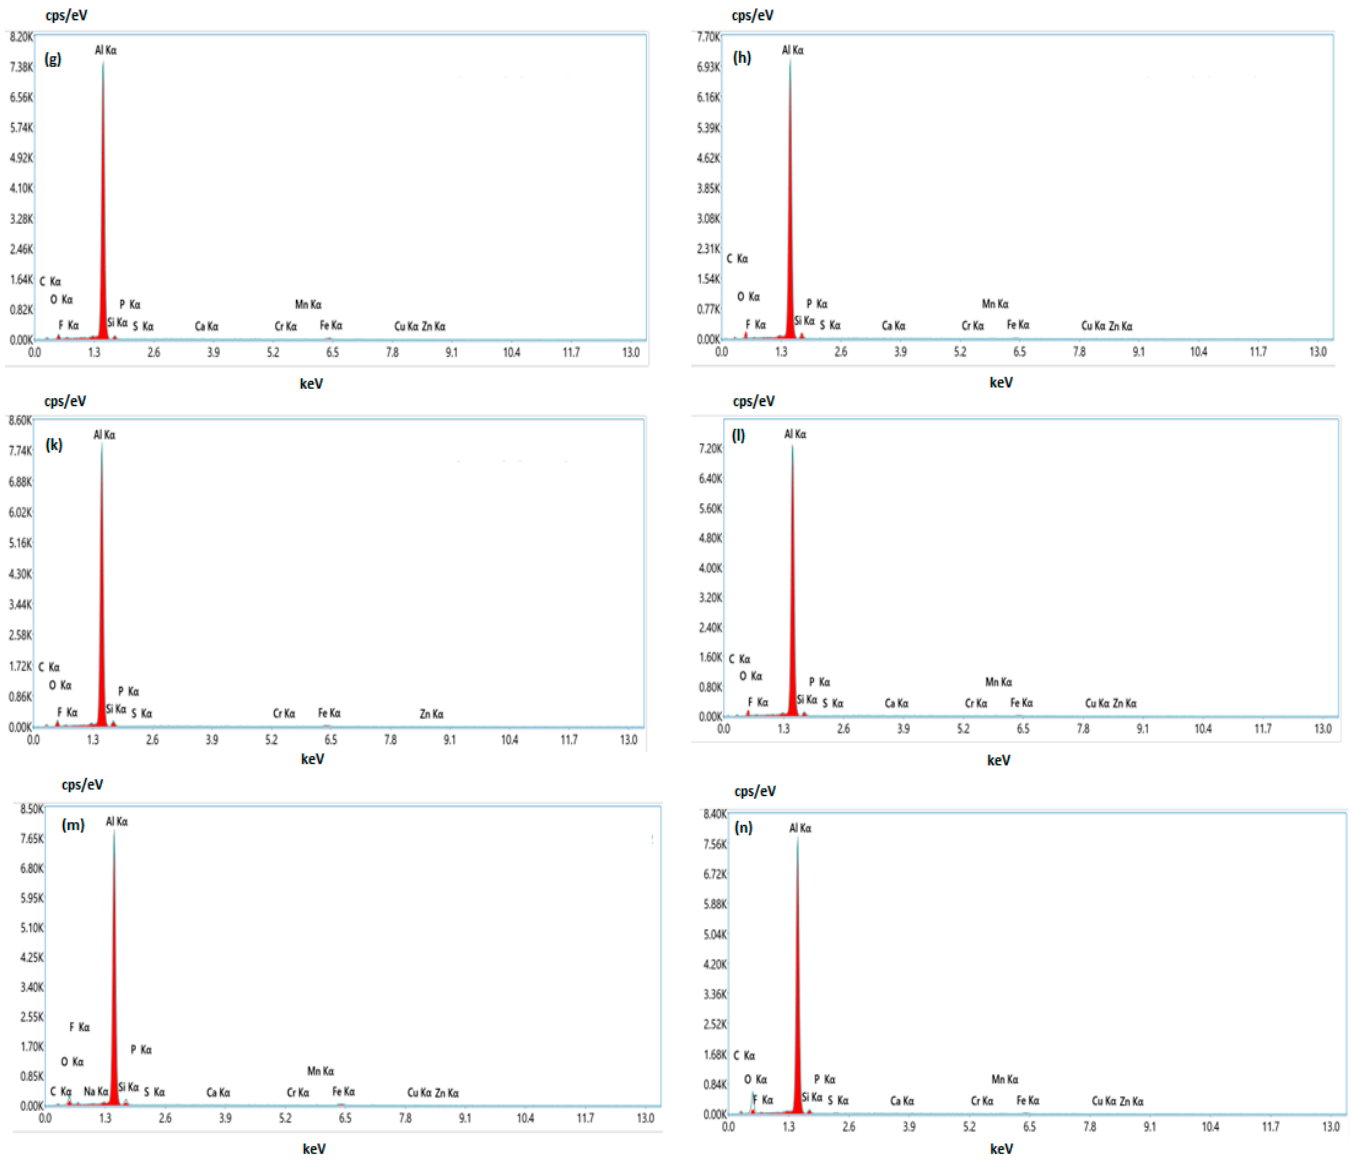

**Figure S3.** EDS analysis of wear scar surface at 30 °C and 80 °C on AL plate lubricated with (g and h) PIL01, (k and l) PIL02, (m and n) 20W40 respectively.
